# Supplementary material for: Type I Interferon Potentiates IgA Immunity to Respiratory Syncytial Virus Infection During Infancy
Source: Springer Nature journal article supplement (doi:10.1038/s41598-018-29456-w), 2018-07-17
Supplement: 41598_2018_29456_MOESM1_ESM.pdf [file 41598_2018_29456_MOESM1_ESM.pdf]

# “Type I interferon potentiates humoral immunity in the nasal mucosa”: Supplementary material

Diego R. Hijano<sup>1</sup>, David T. Siefker<sup>2</sup>, Bishwas Shrestha<sup>2</sup>, Sridhar Jaligama<sup>2</sup>, Luan D Vu<sup>2</sup>, Heather Tillman<sup>3</sup>, David Finklestein<sup>4</sup>, Jordy Saravia<sup>2</sup>, Dahui You<sup>2</sup>, and Stephania A. Cormier<sup>2,5,\*</sup>

<sup>1</sup>Department of Infectious Diseases, St. Jude Children's Research Hospital, Memphis, Tennessee

<sup>2</sup>Department of Pediatrics, University of Tennessee Health Science Center, Memphis, Tennessee

<sup>3</sup>Department of Pathology, St. Jude Children's Research Hospital, Memphis, Tennessee

<sup>4</sup>Department of Computational Biology, St. Jude Children's Research Hospital, Memphis, Tennessee

<sup>5</sup>Children's Foundation Research Institute, Memphis, Tennessee

## Supplementary Figure 1: Gating strategy

### Supplementary Figure 2 (related to Figure 1):

(A) Venn diagram for the numbers of common and specific genes in NALT of neonatal mice that received IFN- $\alpha$  (INR) compared to those that received media (NR) or were depleted of B cells prior to RSV infection. (B) Description of GSEA analysis plot. (C) GSEA comparison for INR and NR NALT for granulocyte migration, neutrophil immunity, regulation of T cell proliferation and MAPK activity. (D) Volcano plot showing significance versus fold change of gene expression of neonatal mice that received IFN- $\alpha$  (INR) vs neonatal mice that received palivizumab. (E) Principal component analysis of lung gene expression of neonatal mice that received IFN- $\alpha$  (INR) compared to those that received media (NR) or were depleted of B cells prior to RSV infection. (F) *NSI* gene expression in lungs from RSV-infected adult (gray) and neonatal mice receiving IFN- $\alpha$  (IRN/red), placebo (NR/blue), or anti CD-20 (green) 16 h before infection. n=3-5; N=2 \* $P < 0.05$ , \*\* $P < 0.01$

### Supplementary Figure 3 (related to Figure 1):

Percentage of inflammation in lungs from RSV-infected neonatal mice receiving IFN- $\alpha$  (INNR/maroon) or placebo (INR/blue) 16 h before infection. Controls were inoculated with media (black). n=3-5; N=2 \* $P < 0.05$ , \*\* $P < 0.01$

### Supplementary Figure 4 (related to Figure 5):

Intracellular IgA positive cells by flow cytometry in NALT and lungs from adult (ARR) and neonatal mice that received IFN- $\alpha$  (INRR) or placebo (NRR) 24 hrs. prior to RSV infection, reinfected 4 weeks after primary infection (A-C). Intracellular IgA. (A) Representative flow cytometry panels of B220+CD19+IgA+ cells. (B) Percentage of B220+CD19+IgA+ 7 days post-secondary infection in NALT; (C) Percentage of B220+CD19+IgA+ 7 days post-secondary infection in lung. n=3-5; N=2

**Supplementary Figure 5 (related to Figure 6):**

RSV specific mucosal IgA in the respiratory tract.

(A-C) RSV specific mucosal IgA at 21 days post-infection different time points from RSV infected adult (AR) and neonatal mice (NR). Age matched controls for adult (AS) and neonatal (NS) mice. (A) NALT; (B) Bronchoalveolar lavage; (C) Lungs homogenates. Dotted line represents lower limit of detection of the assay. n=3-5; N=2

**Supplementary Figure 6:**

Animal model, animal groups and different interventions used for the experiment described in the manuscript.

# Supplementary Figure 1

## Gating strategy

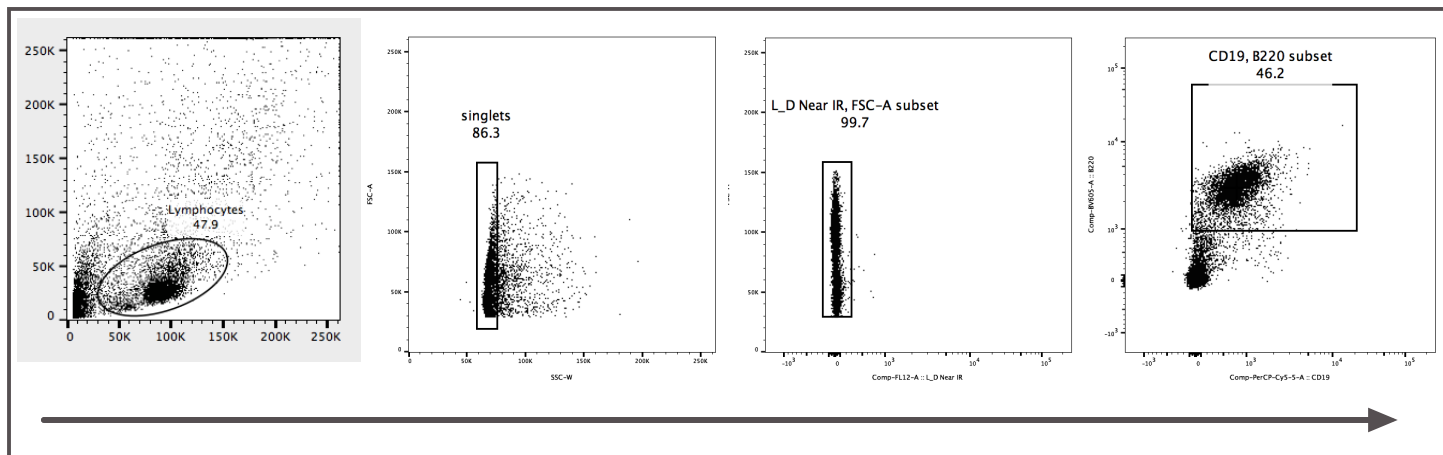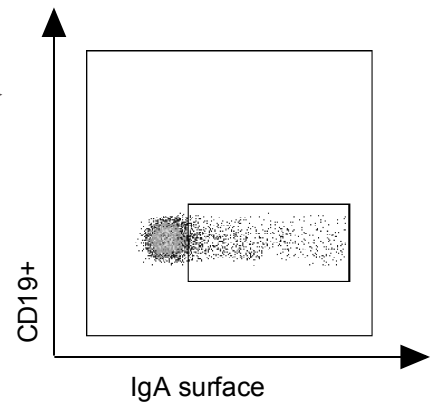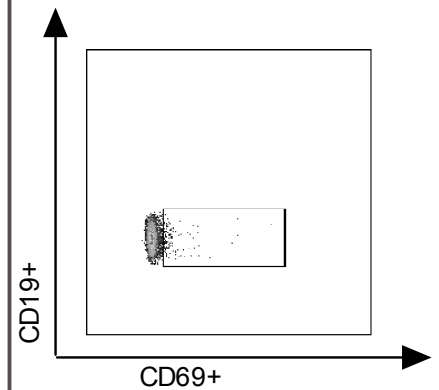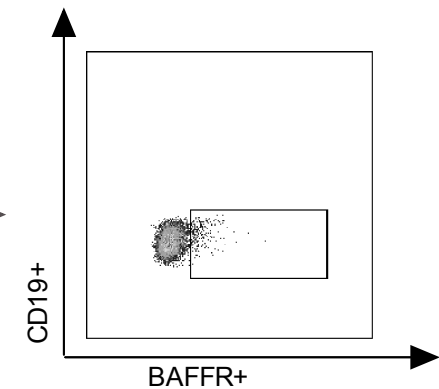

### Antibodies

IgA-FITC – BD Biosciences – 553478  
IgA-PE – BD Biosciences – 562141  
CD69-BV786 - BD Biosciences 564683  
B220-BV605 – BD Biosciences 563708  
CD19-PerCp-Cy5.5 – BD Biosciences 551001  
CD11c-PE-CY7 – BD Biosciences 558079  
CD317 (pDCA1)-BV421 – BD Biosciences 566431  
CD268 (BAFF Receptor)-APC – eBiosciences 17-9117-42  
Live/Dead Near IR- Molecular Probes – L34975

# Supplementary Figure 2

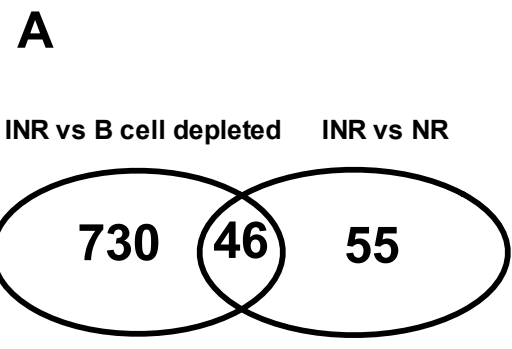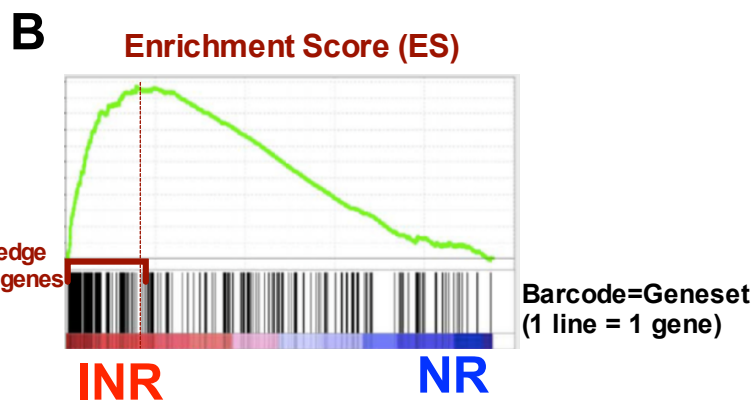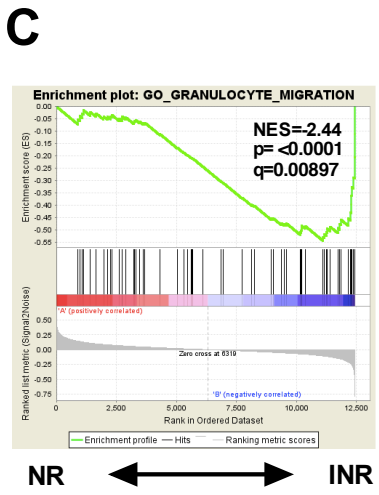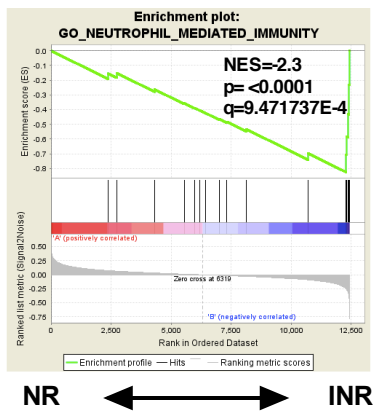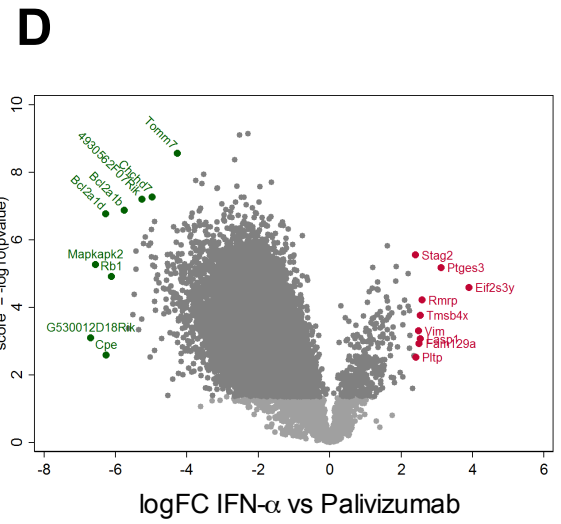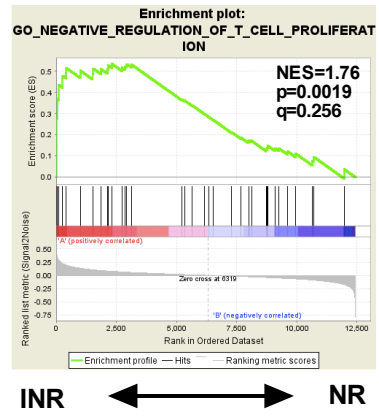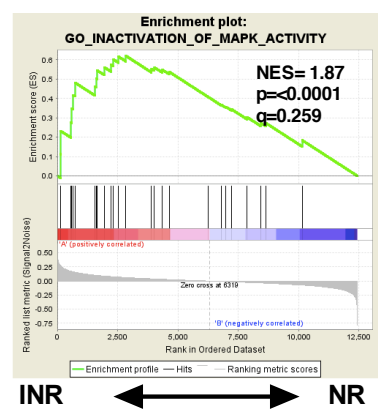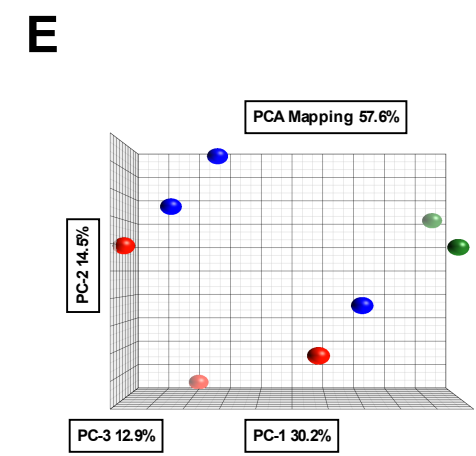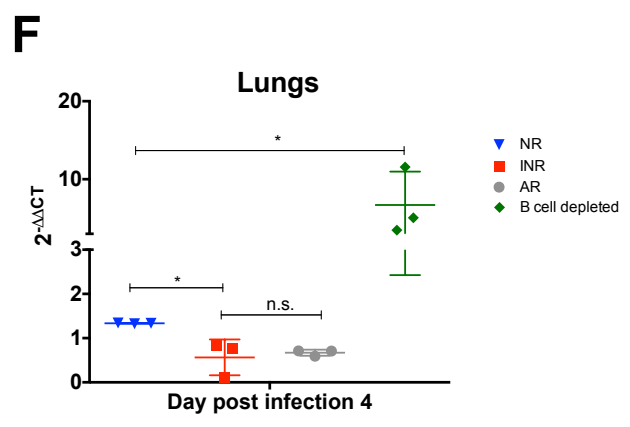

# Supplementary Figure 3

Control

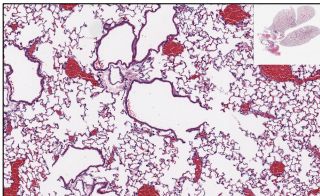

NRR

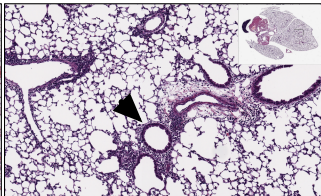

INRR

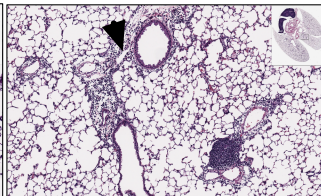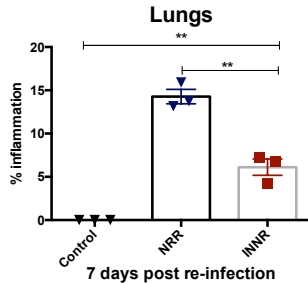

# Supplementary Figure 4

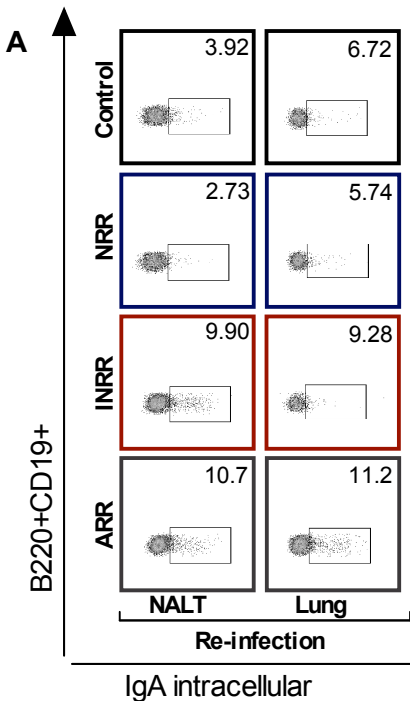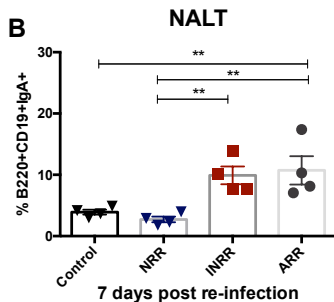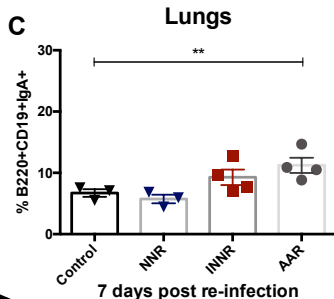

# Supplementary Figure 5

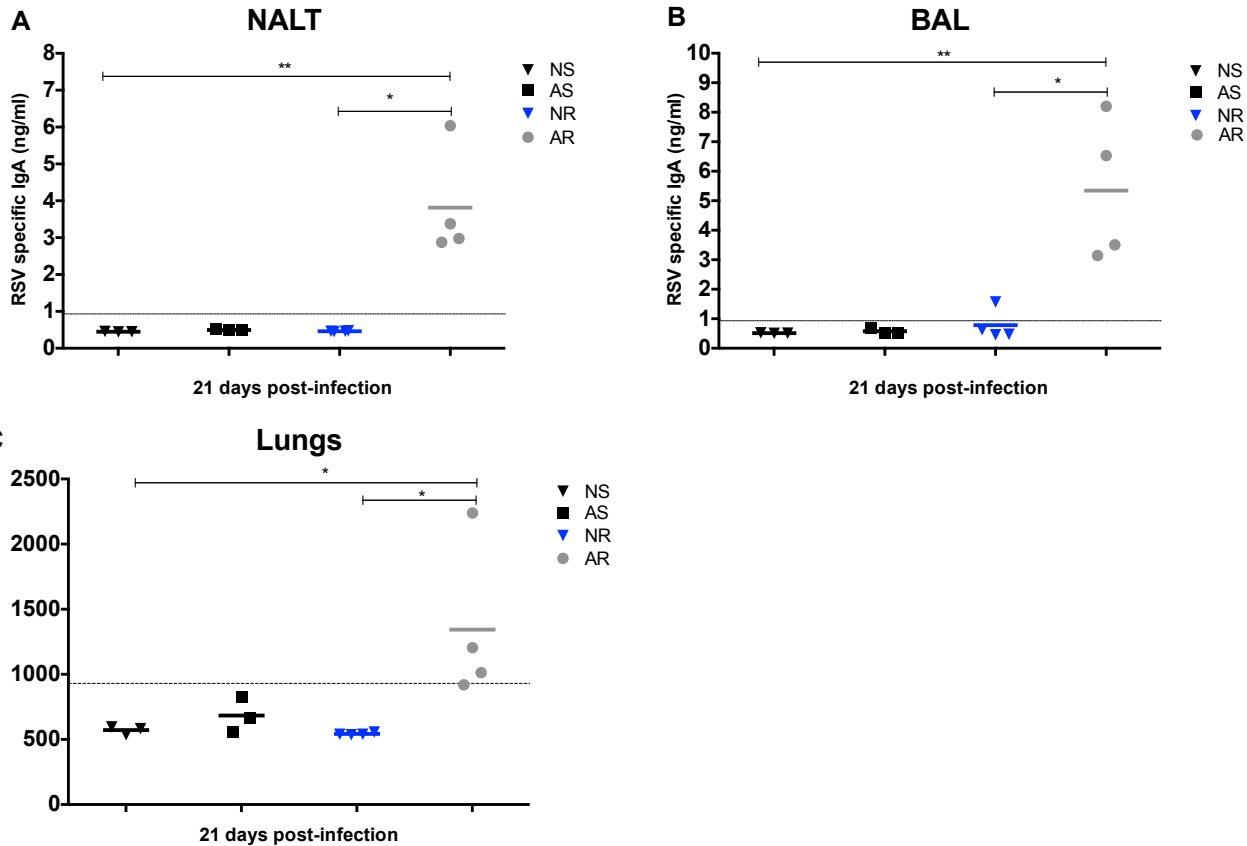

# Supplementary Figure 6

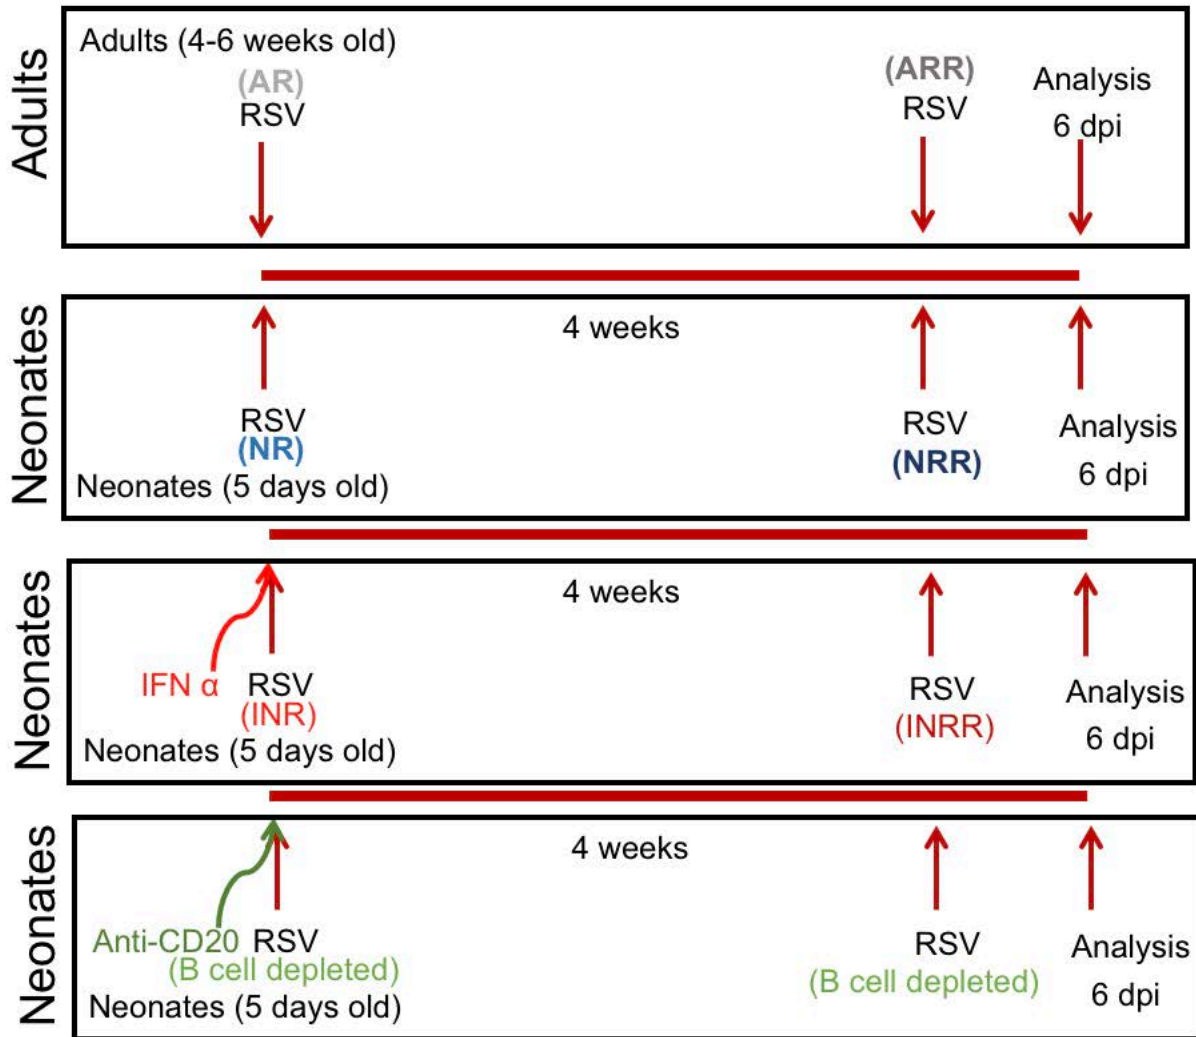



**Supplementary Table 1:** Expression of genes involved in regulation of the inflammatory response.

| Gene Symbol | INR (mean)* | Palivizumab (mean)* | p value    | Log FC     | FDR        |
|-------------|-------------|---------------------|------------|------------|------------|
| Xcl1        | 4.001560211 | 6.04968977          | 0.0255268  | -2.0481296 | 0.03022062 |
| Clec4g      | 3.353630066 | 5.893539906         | 0.00045433 | -2.5399098 | 0.00138147 |
| Dusp18      | 4.388689995 | 6.587800026         | 0.00311915 | -2.19911   | 0.00520468 |
| Dusp10      | 7.815410137 | 10.32989979         | 0.00464768 | -2.5144897 | 0.00706941 |
| Dusp9       | 3.607120037 | 6.599470139         | 0.00010193 | -2.9923501 | 0.00060953 |
| Dusp7       | 6.849430084 | 9.331230164         | 0.00035158 | -2.4818001 | 0.00118886 |
| Lax1        | 4.186950207 | 6.705649853         | 0.00328686 | -2.5186996 | 0.00540932 |

\*Results are expressed as means of 4 mice per group.

**Supplementary Table 2:** Expression of genes involved in granulocyte and neutrophil migration.

| Gene Symbol | INR (mean)* | Palivizumab (mean)* | p value    | Log FC     | FDR        |
|-------------|-------------|---------------------|------------|------------|------------|
| Cklf        | 6.052740097 | 9.923999786         | 3.6649E-05 | -3.8712597 | 0.00038382 |
| Pde4b       | 7.904960155 | 10.0934             | 0.00021007 | -2.1884398 | 0.00088198 |
| C5ar1       | 3.90557003  | 6.657660007         | 4.1685E-07 | -2.75209   | 0.00012179 |
| Trem1       | 3.987540007 | 6.51928997          | 0.00040153 | -2.53175   | 0.0012811  |
| Edn2        | 3.812589884 | 5.981460094         | 4.1943E-05 | -2.1688702 | 0.00040904 |
| Il1b        | 4.342830181 | 7.820879936         | 5.0005E-06 | -3.4780498 | 0.00019068 |
| S100a8      | 7.316649914 | 10.30179977         | 0.00582763 | -2.9851499 | 0.00850084 |
| Csf3r       | 5.02891016  | 7.486780167         | 0.00026783 | -2.45787   | 0.00101522 |
| Ccl20       | 4.560780048 | 6.678880215         | 0.00780663 | -2.1181002 | 0.01078206 |
| Cxcl5       | 3.230870008 | 5.669290066         | 5.2339E-05 | -2.4384201 | 0.00044859 |

\*Results are expressed as means of 4 mice per group.

**Supplementary Table 3:** IFN- $\alpha$  and Tnfsf13b (BAFF) gene expression.

| Gene Symbol | INR (mean)* | Palivizumab (mean)* | p value    | Log FC     | FDR        |
|-------------|-------------|---------------------|------------|------------|------------|
| Ifna1       | 4.18671989  | 6.765270233         | 2.2696E-05 | -2.5785503 | 0.00031633 |
| Ifna2       | 3.32118011  | 6.461239815         | 0.00013454 | -3.1400597 | 0.00070665 |
| Ifna5       | 5.24568987  | 7.683740139         | 1.7437E-05 | -2.4380503 | 0.00028263 |
| Ifna6       | 3.72046995  | 6.45333004          | 0.00010143 | -2.7328601 | 0.00060952 |
| Ifna7       | 4.06274986  | 7.142149925         | 8.8788E-05 | -3.0794001 | 0.00057018 |
| Ifna11      | 2.98958993  | 5.263639927         | 0.00053228 | -2.27405   | 0.00153147 |
| Ifna14      | 3.24411988  | 5.841479778         | 4.226E-06  | -2.5973599 | 0.00018788 |
| Ifna16      | 3.52806997  | 6.228750229         | 3.9546E-05 | -2.7006803 | 0.00039934 |
| Tnfsf13b    | 4.44101     | 6.717189789         | 0.00376091 | -2.2761798 | 0.00600049 |

\*Results are expressed as means of 4 mice per group.
